# Supplementary material for: Ligand–metal-drug coordination based micelles for efficient intracellular doxorubicin delivery
Source: Royal Society of Chemistry journal article supplement (doi:10.1039/c5ra05747g), 2015-01-01
Supplement: c5ra05747g1.pdf [file c5ra05747g1.pdf]

## Supporting Information

### **Ligand-Metal-Drug Coordination Based Micelles for Efficient Intracellular Doxorubicin Delivery**

**Lan Bai, Fei Song\*, Xiao-hui Wang, Jiang-yong-quan Cao, Xue Han, Xiu-li**

**Wang, Yu-zhong Wang\***

Center for Degradable and Flame-Retardant Polymeric Materials (ERCPM-MoE), College of Chemistry, State Key Laboratory of Polymer Materials Engineering, National Engineering Laboratory of Eco-Friendly Polymeric Materials (Sichuan), Sichuan University, 29 Wangjiang Road, Chengdu 610064, China.

E-mail: [songfei520@gmail.com](mailto:songfei520@gmail.com); [yzwang@scu.edu.cn](mailto:yzwang@scu.edu.cn)

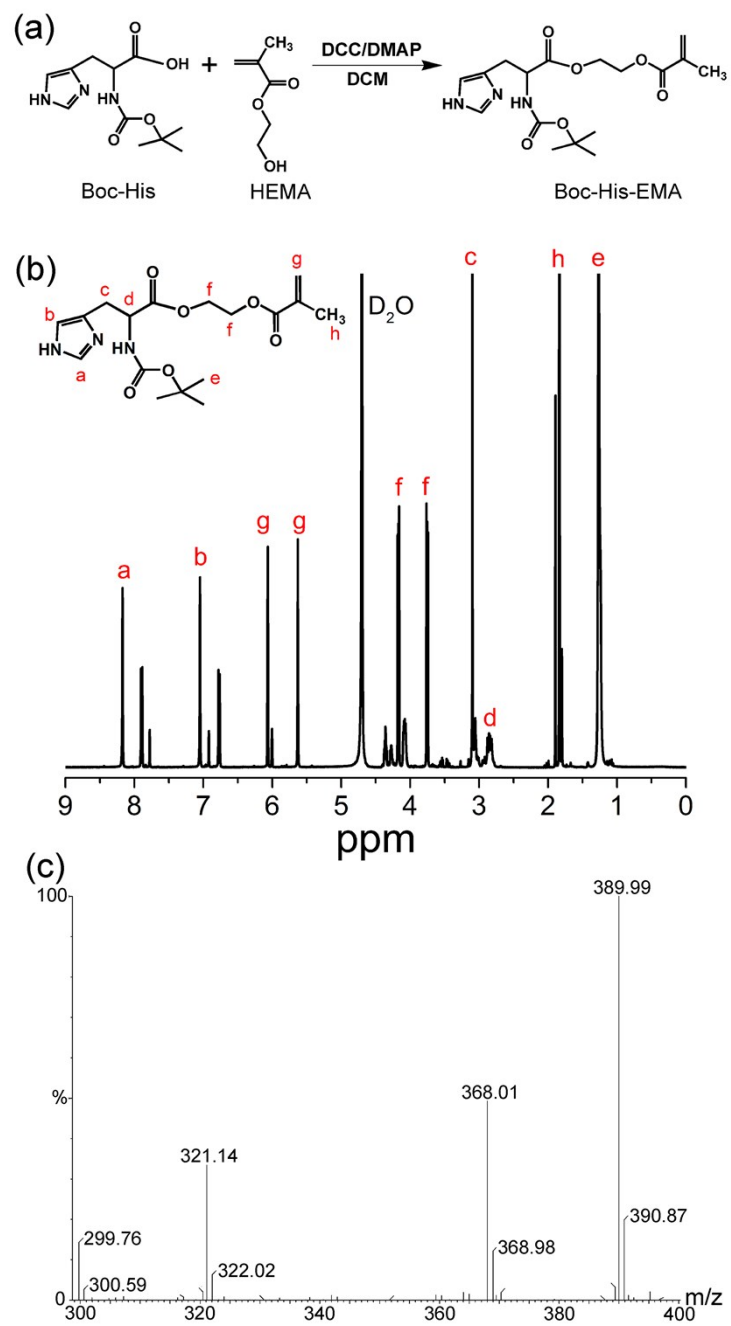

Fig. S1 (a) Synthetic route, (b)  $^1\text{H}$  NMR and (c) EIS-TOF MS spectra of Boc-His-EMA.

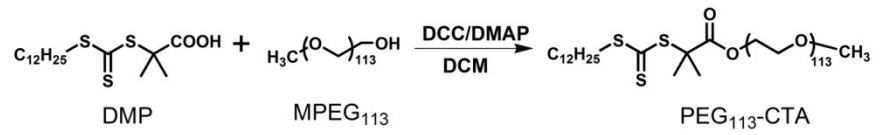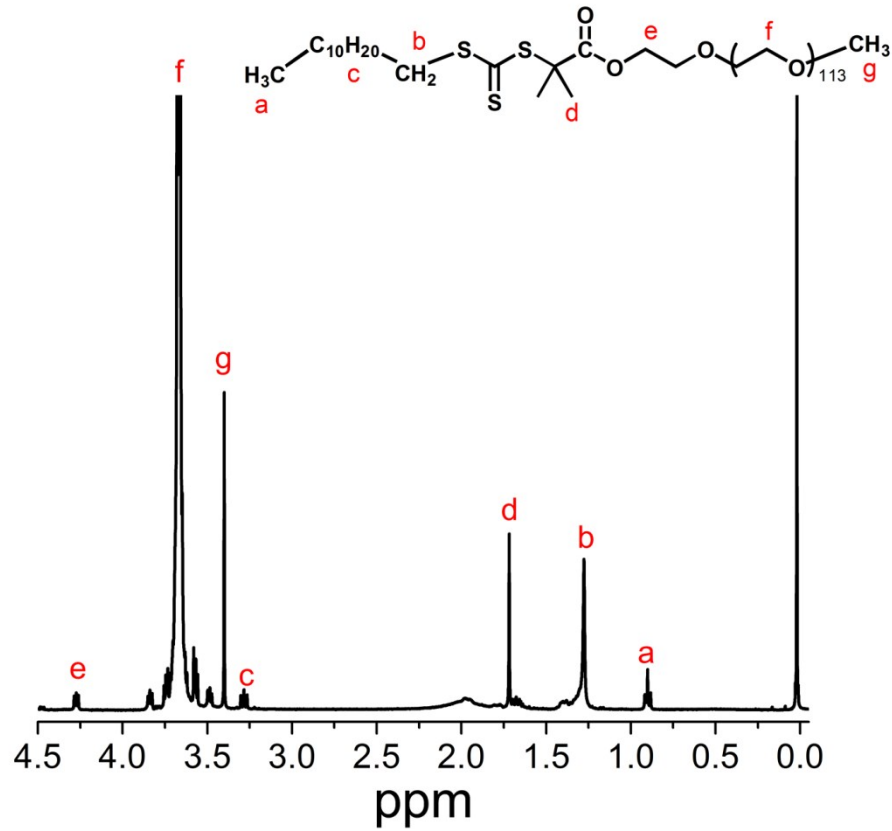

Fig. S2 Synthetic route and  $^1\text{H}$  NMR spectrum of PEG<sub>113</sub>-CTA.

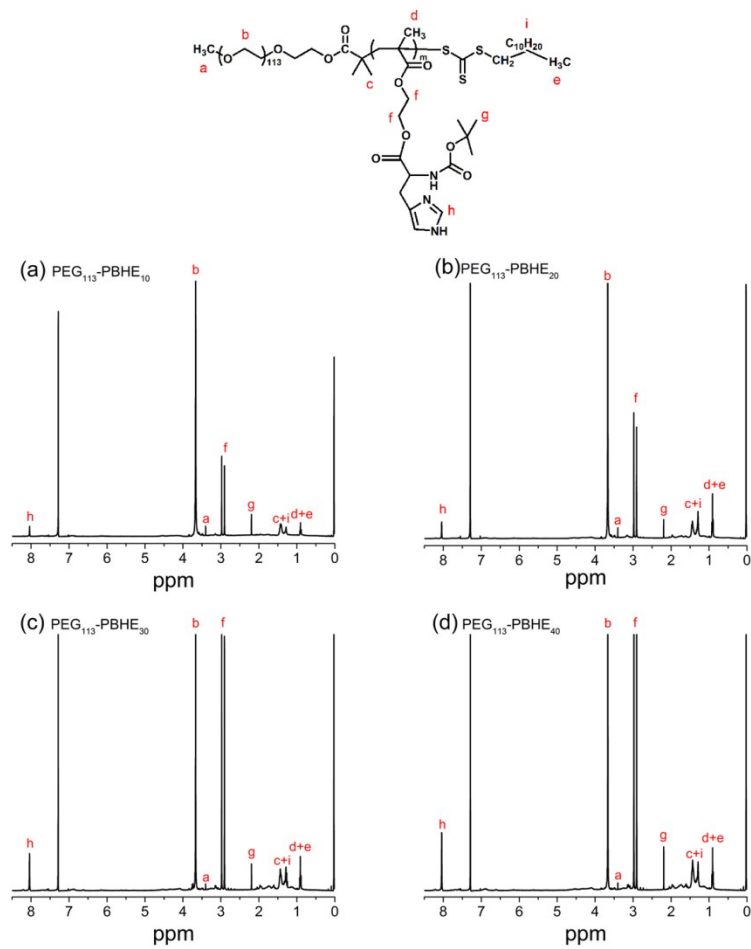

Fig. S3 <sup>1</sup>H NMR spectra of PEG<sub>113</sub>-PBHE<sub>m</sub>.

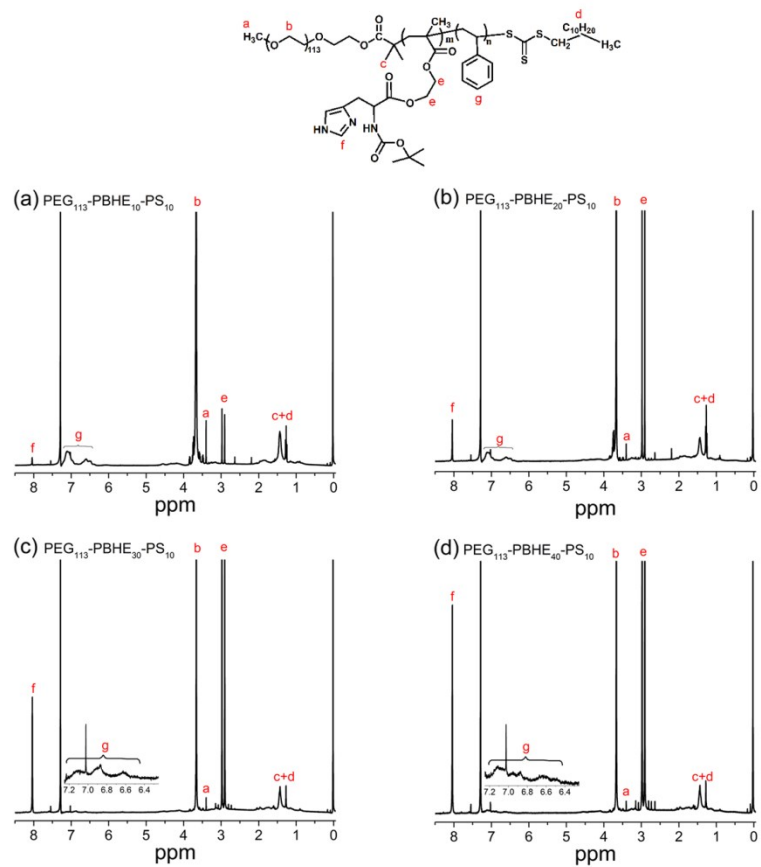

Fig. S4 <sup>1</sup>H NMR spectra of PEG<sub>113</sub>-PBHE<sub>m</sub>-PS<sub>n</sub>.

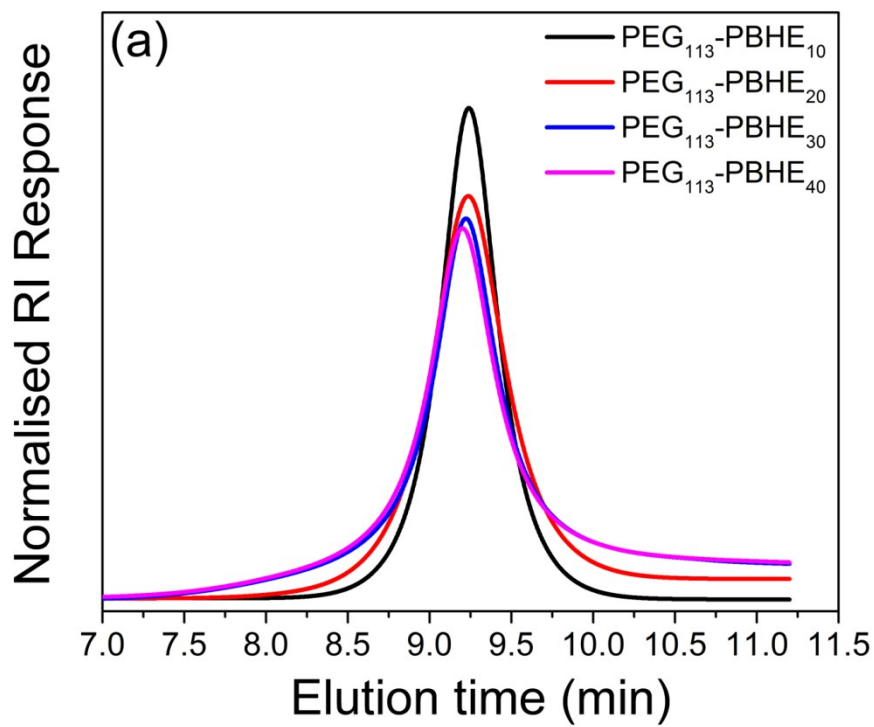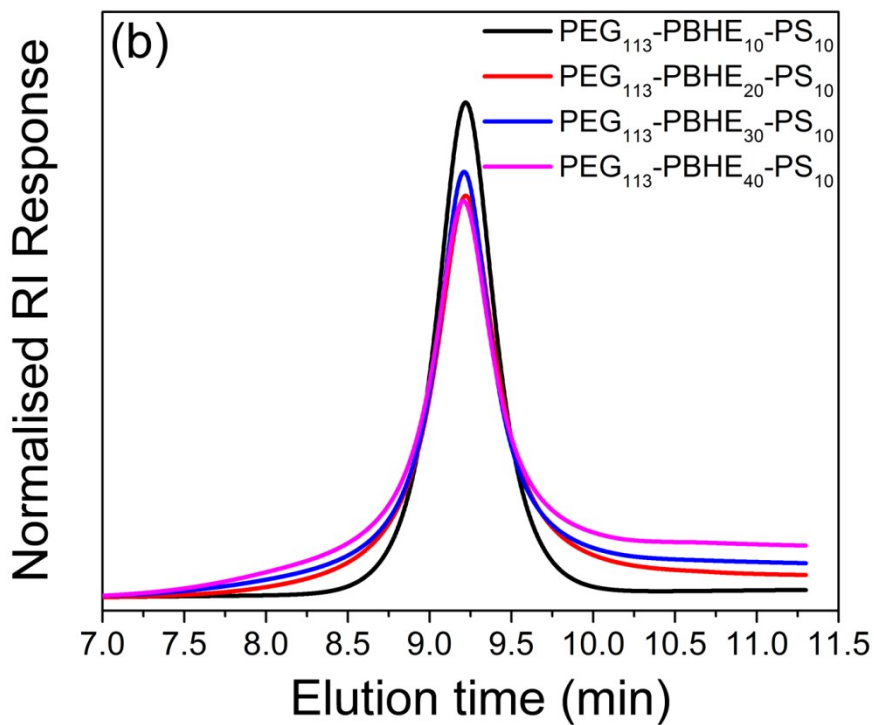

Fig. S5 GPC traces of (a) PEG<sub>113</sub>-PBHE<sub>m</sub> and (b) PEG<sub>113</sub>-PBHE<sub>m</sub>-PS<sub>n</sub>.

Table S1. Structural information of PEG<sub>113</sub>-PBHE<sub>m</sub> and PEG<sub>113</sub>-PBHE<sub>m</sub>-PS<sub>n</sub>

| Block polymers                                               |                                                              | Feed ratio <sup>a</sup> | C <sub>monomer</sub> (%) <sup>b</sup> | M <sub>n</sub> <sup>b</sup> [kgmol <sup>-1</sup> ] | M <sub>n</sub> <sup>c</sup> [kgmol <sup>-1</sup> ] | PDI <sup>c</sup> |
|--------------------------------------------------------------|--------------------------------------------------------------|-------------------------|---------------------------------------|----------------------------------------------------|----------------------------------------------------|------------------|
| Theoretical                                                  | Experimental                                                 |                         |                                       |                                                    |                                                    |                  |
| PEG <sub>113</sub> -PBHE <sub>10</sub>                       | PEG <sub>113</sub> -PBHE <sub>12</sub>                       | 1:15:0.1                | 80                                    | 9409                                               | 6584                                               | 1.32             |
| PEG <sub>113</sub> -PBHE <sub>20</sub>                       | PEG <sub>113</sub> -PBHE <sub>20</sub>                       | 1:30:0.15               | 66.7                                  | 12348                                              | 10745                                              | 1.47             |
| PEG <sub>113</sub> -PBHE <sub>30</sub>                       | PEG <sub>113</sub> -PBHE <sub>32</sub>                       | 1:60:0.3                | 53.3                                  | 16756                                              | 17712                                              | 1.85             |
| PEG <sub>113</sub> -PBHE <sub>40</sub>                       | PEG <sub>113</sub> -PBHE <sub>40</sub>                       | 1:90:0.45               | 44.4                                  | 19696                                              | 19990                                              | 1.93             |
| PEG <sub>113</sub> -PBHE <sub>10</sub> -<br>PS <sub>10</sub> | PEG <sub>113</sub> -PBHE <sub>12</sub> -<br>PS <sub>13</sub> | 1:15:0.1                | 86.6                                  | 10762                                              | 7198                                               | 1.33             |
| PEG <sub>113</sub> -PBHE <sub>20</sub> -<br>PS <sub>10</sub> | PEG <sub>113</sub> -PBHE <sub>20</sub> -<br>PS <sub>14</sub> | 1:20:0.1                | 70                                    | 13805                                              | 13056                                              | 1.55             |
| PEG <sub>113</sub> -PBHE <sub>30</sub> -<br>PS <sub>10</sub> | PEG <sub>113</sub> -PBHE <sub>30</sub> -<br>PS <sub>12</sub> | 1:20:0.1                | 60                                    | 16964                                              | 18930                                              | 1.88             |
| PEG <sub>113</sub> -PBHE <sub>40</sub> -<br>PS <sub>10</sub> | PEG <sub>113</sub> -PBHE <sub>40</sub> -<br>PS <sub>10</sub> | 1:20:0.1                | 50                                    | 20737                                              | 20079                                              | 2.01             |

a [PEG<sub>113</sub>-CTA]:[BHE]:[AIBN] for diblock polymer; [PEG<sub>113</sub>-PBHE<sub>m</sub>-CTA]:[styene]:[AIBN] for triblock polymer.

b Conversion of monomer calculated by <sup>1</sup>H NMR results.

c Measured by GPC.

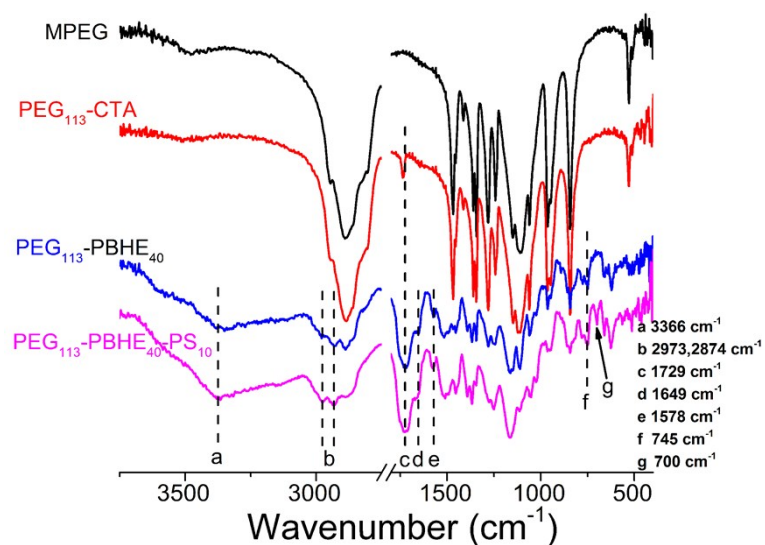

**Fig. S6** FT-IR spectra of MPEG, PEG<sub>113</sub>-CTA, PEG<sub>113</sub>-PBHE<sub>40</sub> and PEG<sub>113</sub>-PBHE<sub>40</sub>-PS<sub>10</sub>

The weak peak at 1729 cm<sup>-1</sup> of PEG<sub>113</sub>-CTA was attributed to the C=O stretching vibration of terminal carboxy group. The peaks at the same position of PEG<sub>113</sub>-PBHE<sub>40</sub> and PEG<sub>113</sub>-PBHE<sub>40</sub>-PS<sub>10</sub> became much stronger than that of PEG<sub>113</sub>-CTA, due to the increasing amount of C=O bonds of PBHE blocks. The peaks at 3366 cm<sup>-1</sup> (N-H stretching vibration of Boc- protected primary amine of His), 2973/2874 cm<sup>-1</sup> (C-H stretching vibration of imidazole ring), 1649 cm<sup>-1</sup> (C-N stretching vibration of imidazole), 1578 cm<sup>-1</sup> (C=N stretching vibration of imidazole) and 745 cm<sup>-1</sup> (C-H bending vibration of imidazole ring) of PEG<sub>113</sub>-PBHE<sub>40</sub> and PEG<sub>113</sub>-PBHE<sub>40</sub>-PS<sub>10</sub> were also the characteristic signals of PBHE blocks. And the peak of PEG<sub>113</sub>-PBHE<sub>40</sub>-PS<sub>10</sub> at 700 cm<sup>-1</sup> was assigned to the C-H bending vibration of benzene ring, suggesting the presence of PS blocks.



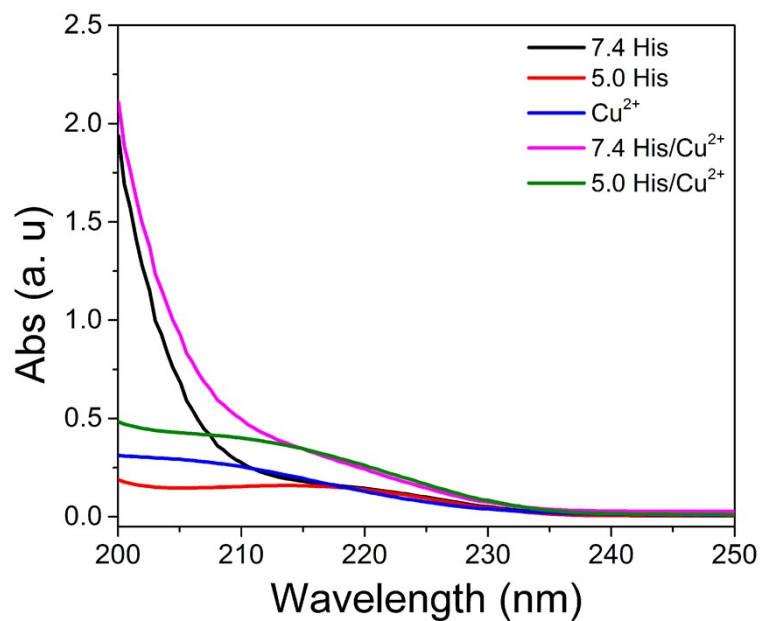

Fig. S7 UV-Vis spectra of His and His/Cu<sup>2+</sup> aqueous solution at pH 7.4 and 5.0.

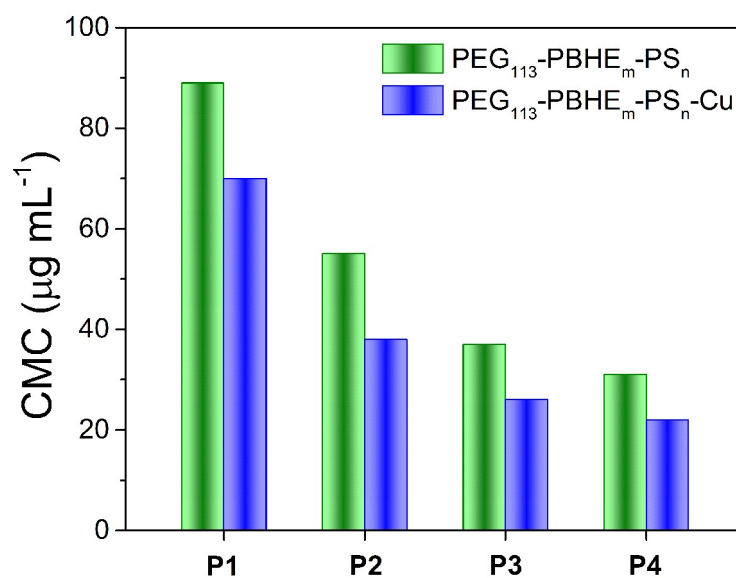

Fig. S8 CMC of PEG<sub>113</sub>-PBHE<sub>m</sub>-PS<sub>n</sub> and PEG<sub>113</sub>-PBHE<sub>m</sub>-PS<sub>n</sub>-Cu micelles at pH 7.4.

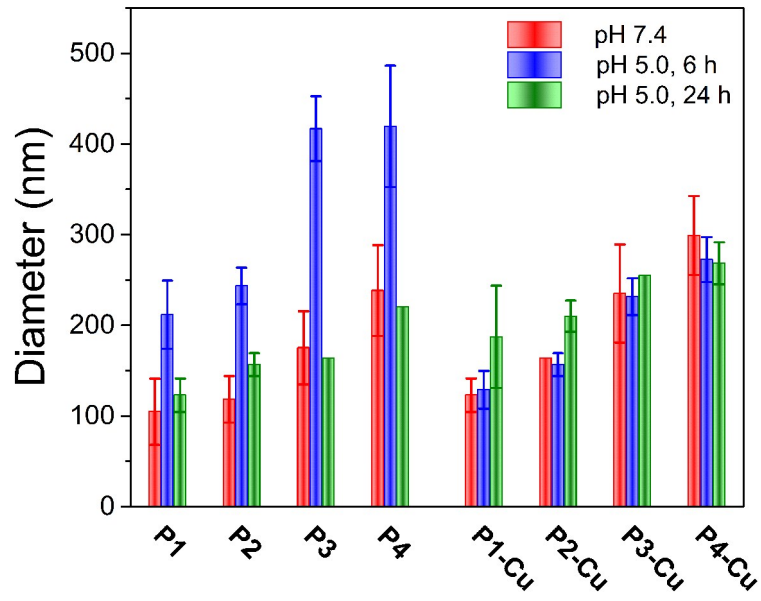

Fig. S9 Diameters of DOX-loaded PEG<sub>113</sub>-PBHE<sub>m</sub>-PS<sub>n</sub> and PEG<sub>113</sub>-PBHE<sub>m</sub>-PS<sub>n</sub>-Cu micelles.

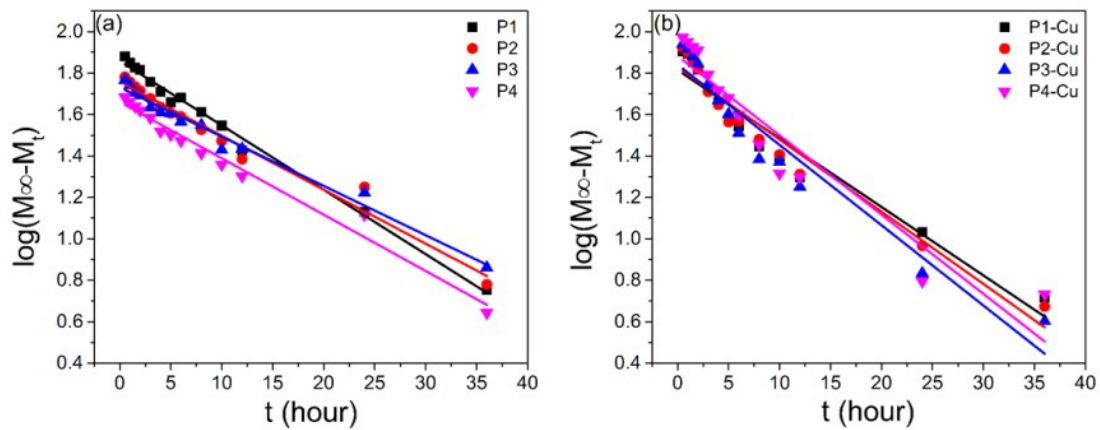

Fig. S10 Linear regression curves of release data of (a) PEG<sub>113</sub>-PBHE<sub>m</sub>-PS<sub>n</sub> and (b) PEG<sub>113</sub>-PBHE<sub>m</sub>-PS<sub>n</sub>-Cu micelles fitted by first-order kinetic model (pH 5.0).

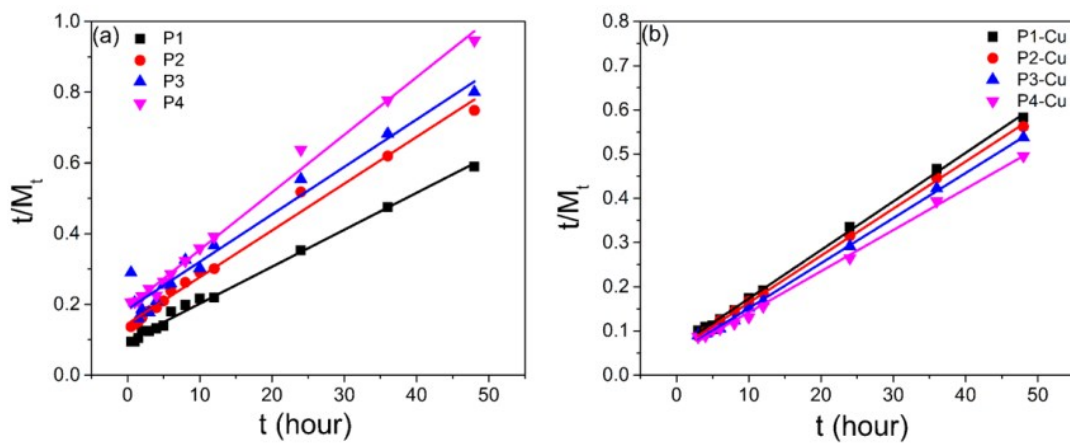

Fig. S11 Linear regression curves of release data of (a) PEG<sub>113</sub>-PBHE<sub>m</sub>-PS<sub>n</sub> and (b) PEG<sub>113</sub>-PBHE<sub>m</sub>-PS<sub>n</sub>-Cu micelles fitted by pseudo-second-order kinetic model (pH 5.0).

Table S2. First-order rate and second-order rate constants for DOX release from PEG<sub>113</sub>-PBHE<sub>m</sub>-PS<sub>n</sub> and PEG<sub>113</sub>-PBHE<sub>m</sub>-PS<sub>n</sub>-Cu micelles.

| Sample       | First-order        |        |                    |        | Second-order |                    |        |
|--------------|--------------------|--------|--------------------|--------|--------------|--------------------|--------|
|              | $M_{\infty}^a(\%)$ | $k_1$  | $M_{\infty}^b(\%)$ | $R^2$  | $k_2$        | $M_{\infty}^c(\%)$ | $R^2$  |
| <b>P1</b>    | 75.6               | 0.0715 | 72.1               | 0.9912 | 0.000109     | 95.6               | 0.9944 |
| <b>P2</b>    | 64.1               | 0.0599 | 57.2               | 0.9715 | 0.000175     | 75.6               | 0.9881 |
| <b>P3</b>    | 60.0               | 0.0547 | 53.8               | 0.9800 | 0.000180     | 74.5               | 0.9563 |
| <b>P4</b>    | 50.7               | 0.0626 | 45.7               | 0.9765 | 0.000265     | 61.4               | 0.9927 |
| <b>P1-Cu</b> | 82.3               | 0.0761 | 65.3               | 0.9349 | 0.000121     | 90.9               | 0.9987 |
| <b>P2-Cu</b> | 85.3               | 0.0803 | 67.3               | 0.9487 | 0.000113     | 93.8               | 0.9992 |
| <b>P3-Cu</b> | 89.2               | 0.0892 | 69.3               | 0.9316 | 0.000104     | 98.1               | 0.9987 |
| <b>P4-Cu</b> | 96.4               | 0.0881 | 76.2               | 0.8987 | 0.000087     | 107.2              | 0.9971 |

a Experimental cumulative drug release amount at infinite time.

b Theoretical cumulative drug release amount at infinite time calculated from first-order kinetic model.

c Theoretical cumulative drug release amount at infinite time calculated from pseudo-second-order kinetic model.

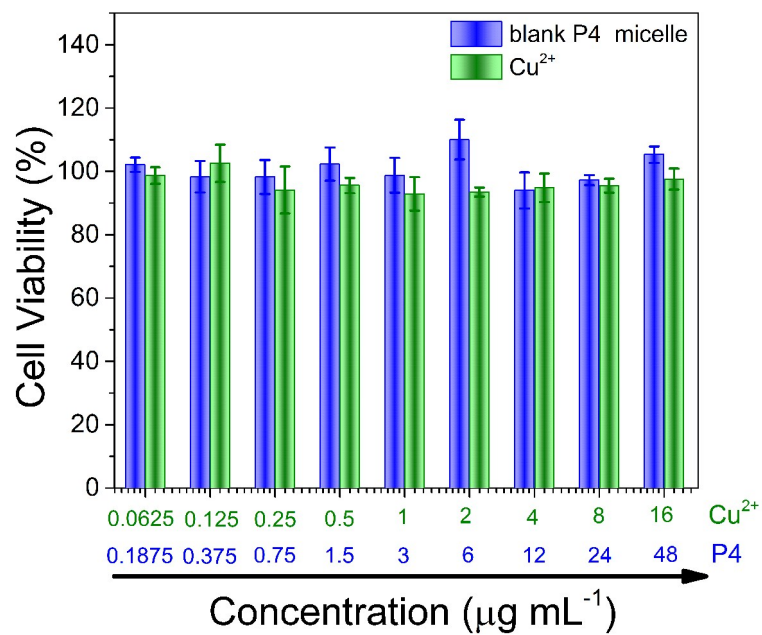

Fig. S12 Viability of HeLa cells after incubation with blank P4 micelles and Cu<sup>2+</sup> for 48 h incubation.
